# Supplementary material
Source: PubMed Central journal article supplement (PMC2789787)
Supplement: supp_M800527-JLR200_Supl.pdf [file supp_M800527-JLR200_Supl.pdf]

Supplemental Fig 1: Postprandial evolution lines of Total TG depending on *APOA1* - 2803 genotype. \*  $p < 0,05$  GA VS AA; \*\* $p < 0,05$  GA VS GG and AA.

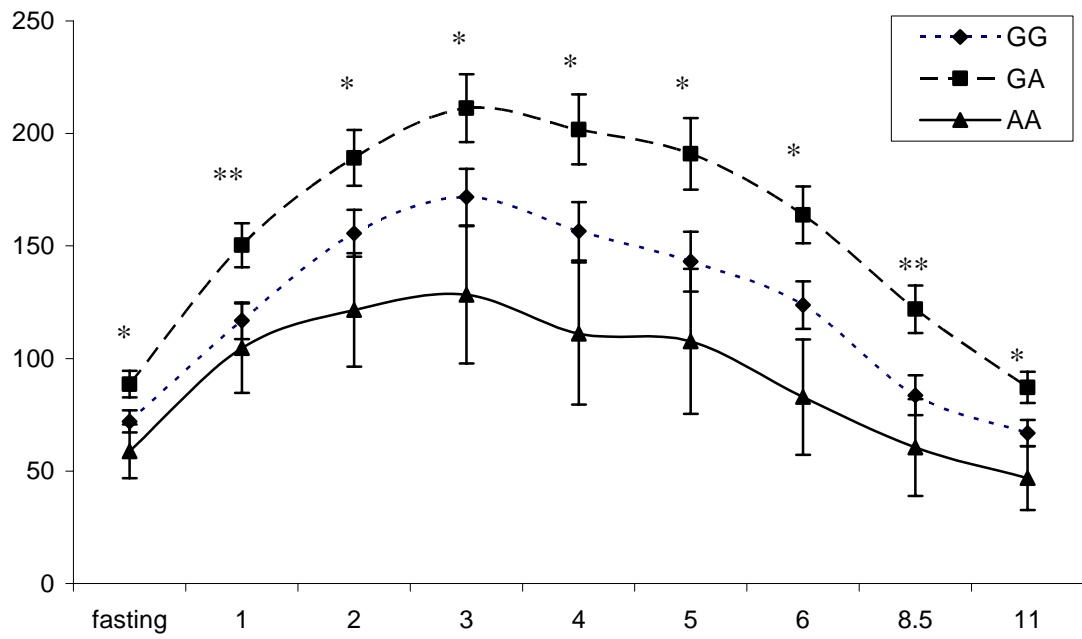

Supplemental Fig 2: Postprandial evolution lines of Large TRL-TG (mg/dl) depending on *APOA1* -2803 genotype. \*  $p < 0,05$  GA VS AA.

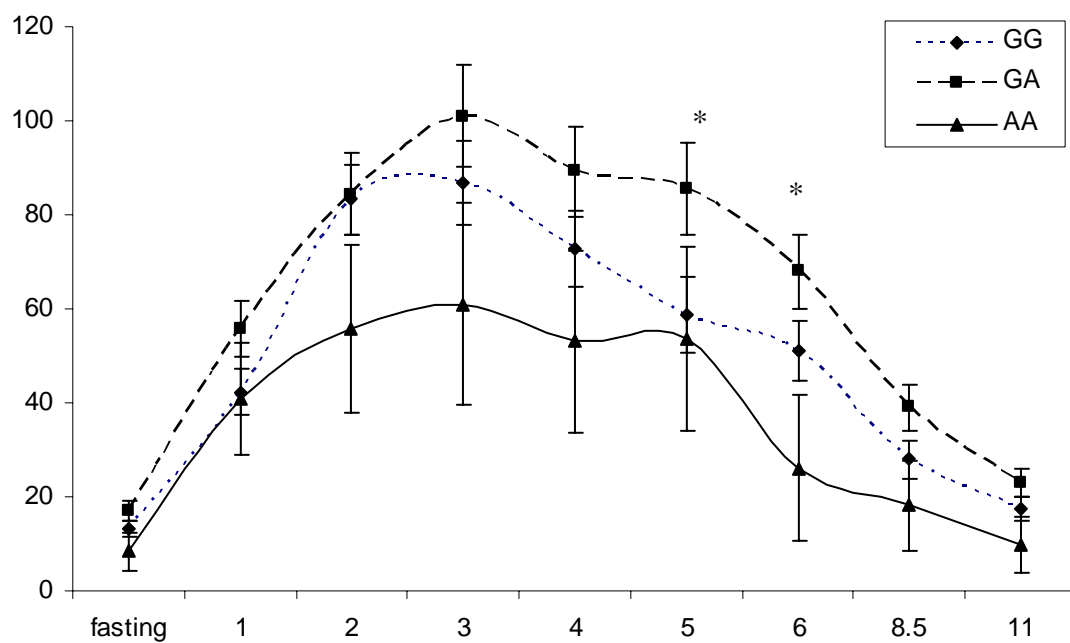

Supplemental Fig 3: Postprandial evolution lines of APOB (mg/dl) depending on *APOA1* -2803 genotype. \*  $p < 0,05$  AA VS GG; \*\* $p < 0,05$  AA VS GG and GA.

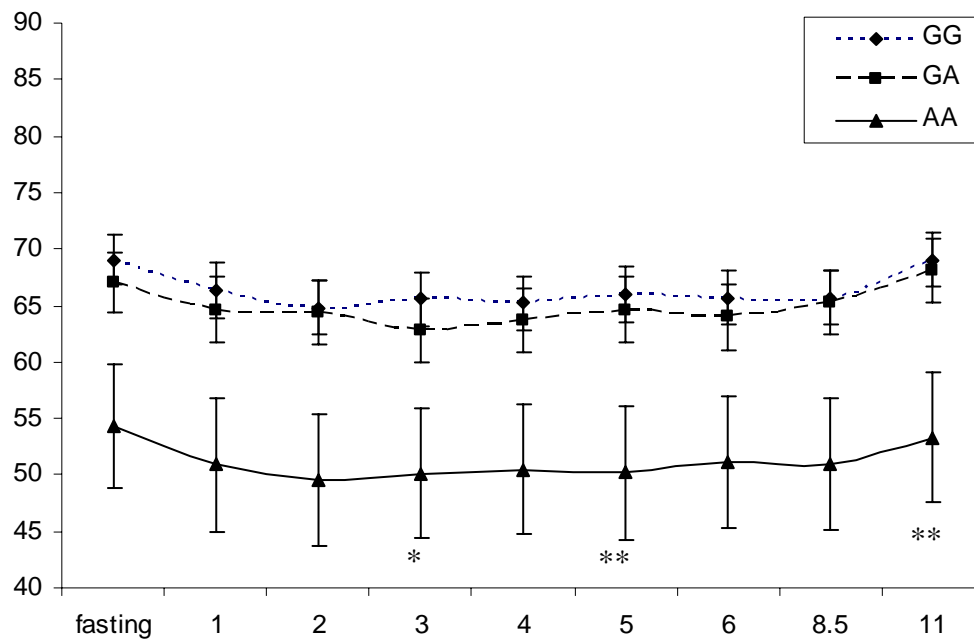

Supplemental Fig 4: Allele-specific binding of transcription factor EBF1 at APOC3 -640C>A. TRANSFAC factor T05427 for EBF1 as applied by MAPPER is predicted to bind to a region of the APOC3 promoter from position -633 to -642 only when the allele is C at position -640 (SNP rs2542052). The minor A allele at -640 is not predicted to support binding of EBF1.

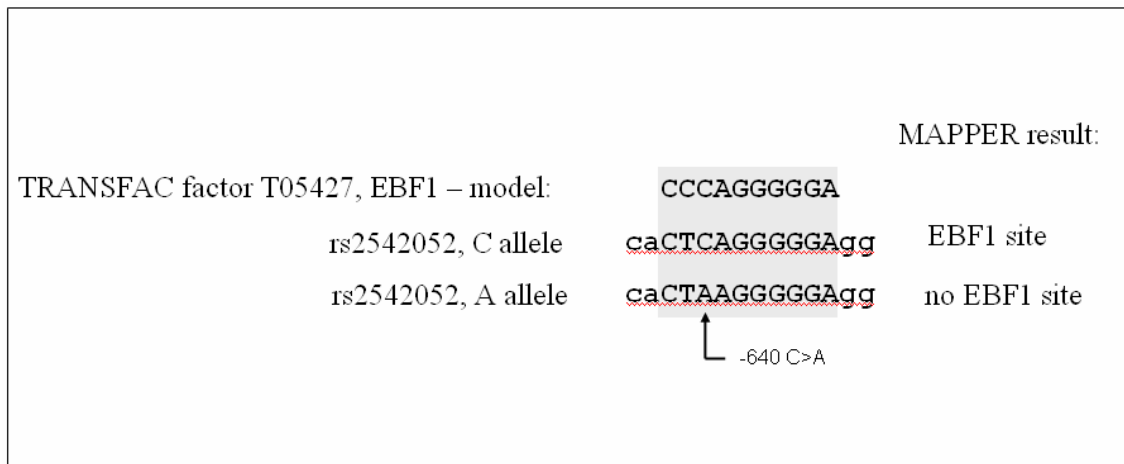

Supplemental Fig 5: Postprandial evolution lines of APOA1 (mg/dl) depending on *APOA4* N147S. \*  $p < 0,05$  GG VS GA.

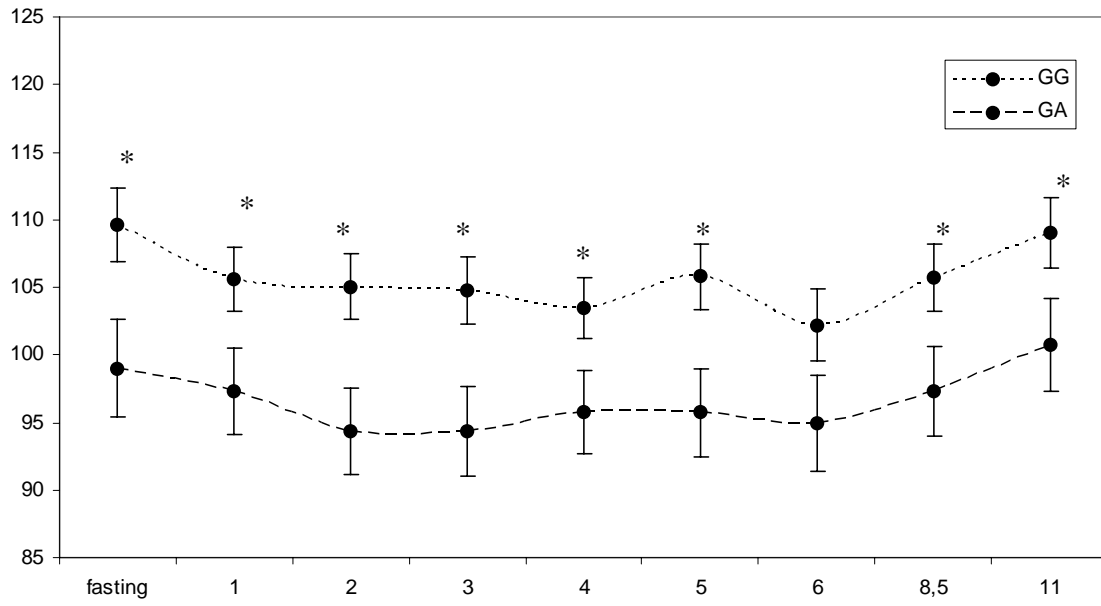

Supplemental Fig 6: Postprandial evolution lines of APOA1 (mg/dl) depending on *APOA4* T29T. \*  $p < 0,05$  AA VS AG.

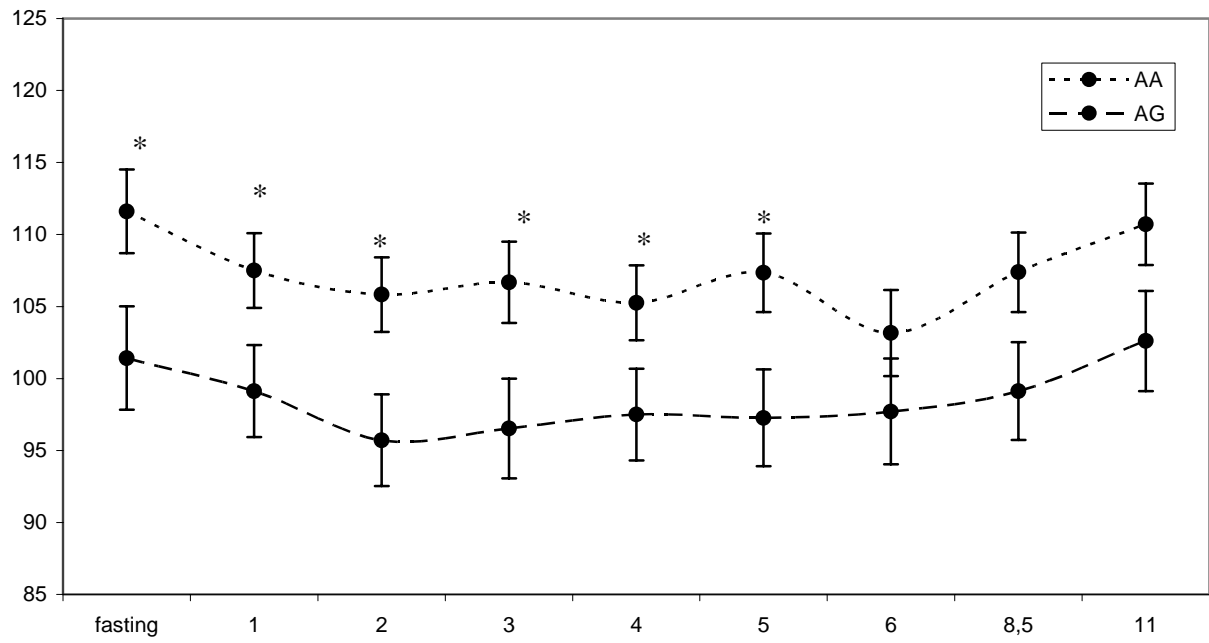

Supplemental Fig 7: Postprandial evolution lines of total cholesterol (mg/dl) depending on *A4A5\_inter*. \* $p < 0,05$  TT VS CC.

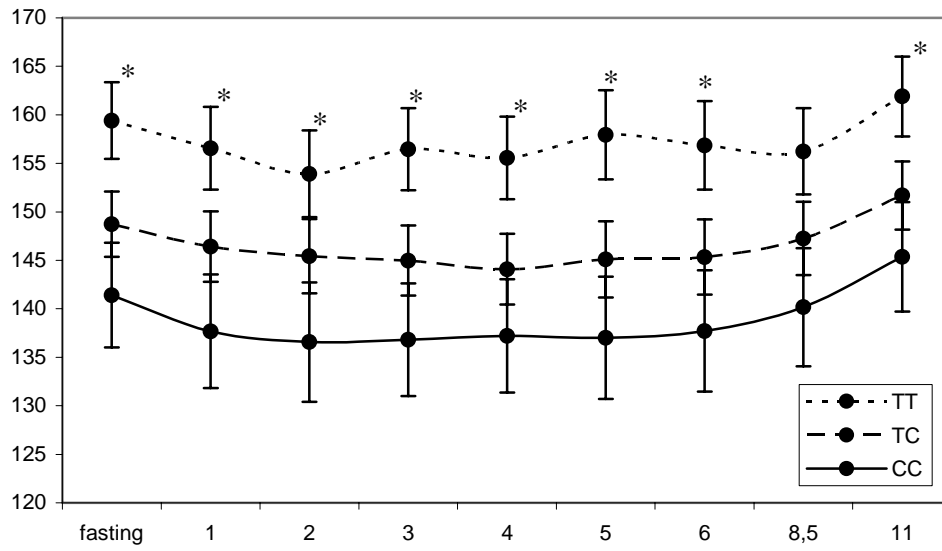

Supplemental Fig 8: Postprandial evolution lines of TG (mg/dl) depending on *A4A5\_inter*. \* $p < 0,05$  TT VS TC.

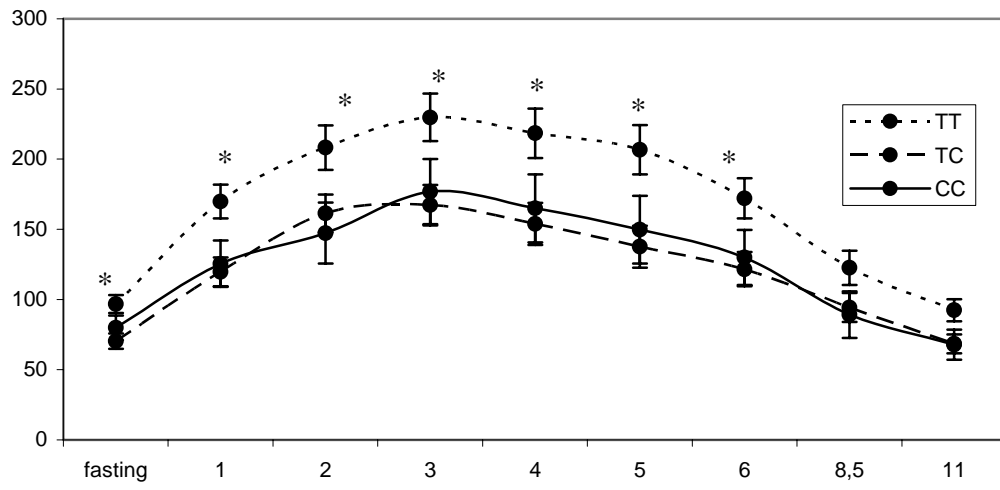



Supplemental Fig 9: Postprandial evolution lines of APOB (mg/dl) depending on *A4A5\_inter*. \*p<0,05 TT VS TC.

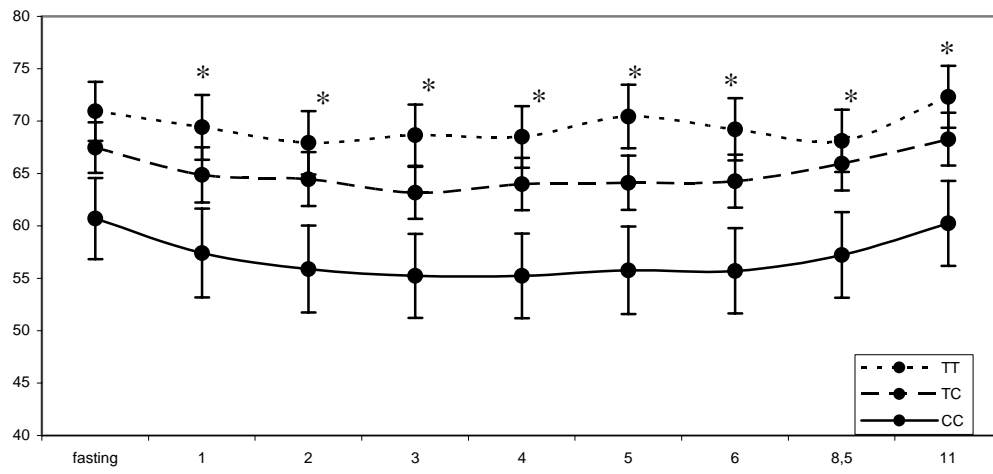

Supplemental Fig 10: Postprandial evolution lines of large TRL-TG (mg/dl) depending on *A4A5\_inter*. \* $p < 0,05$  TT VS TC.

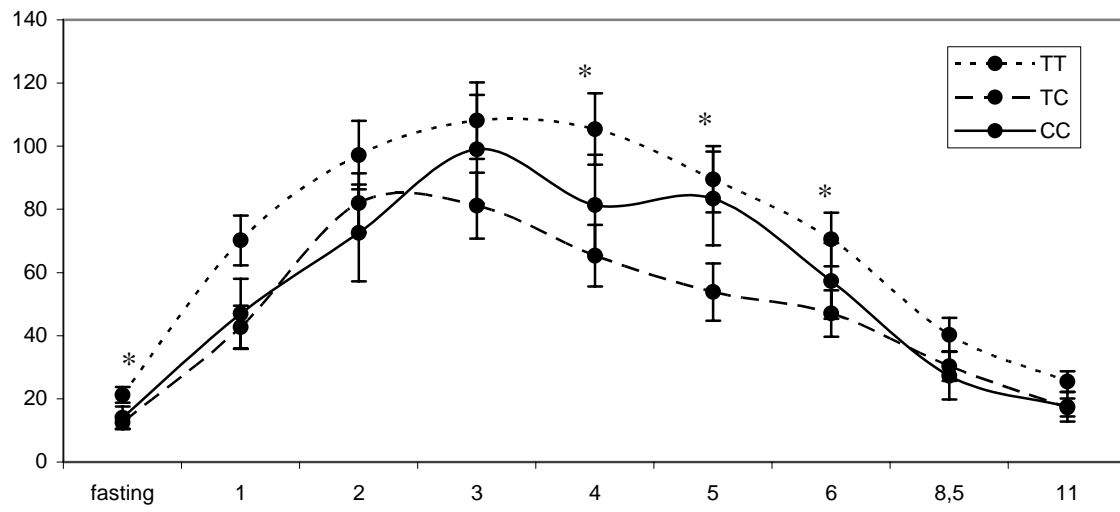

Supplemental Fig 11: Postprandial evolution lines of large TRL-CHOL (mg/dl) depending on *A4A5\_inter*. \* $p < 0,05$  TT VS TC; \*\* $p < 0,05$  TT VS TC and CC.

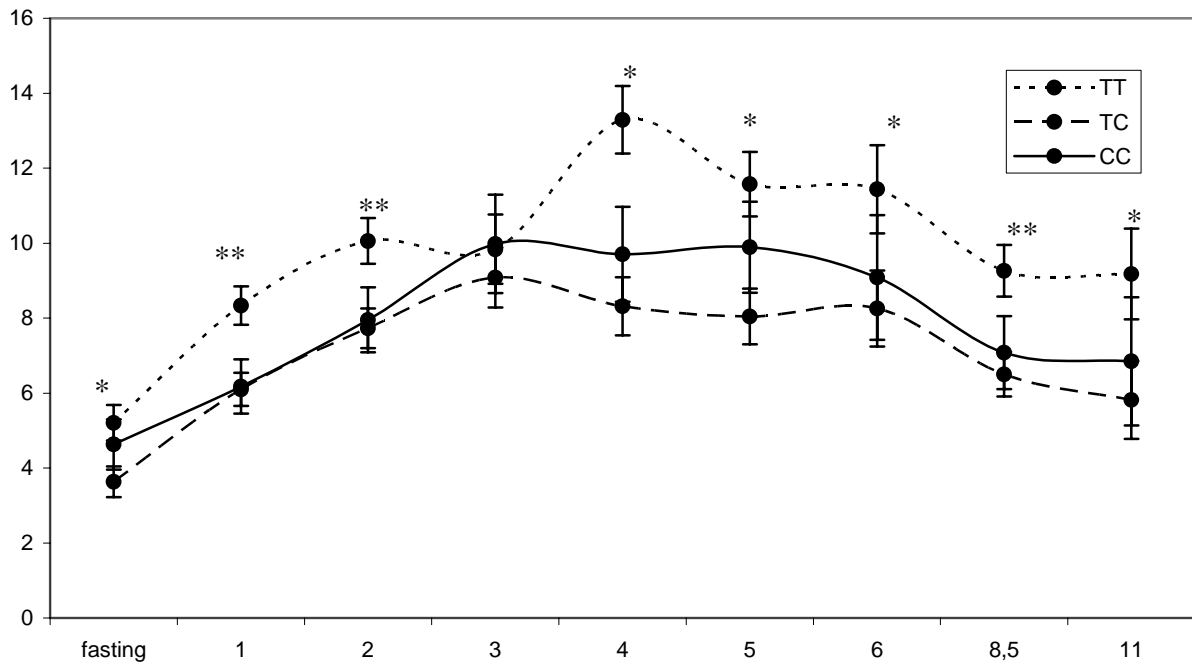

Supplemental Table1: Common names, rs accession numbers and primer sequences of the SNPs assayed in this study.

| SNP<br>(rs number)           | PRIMERS                                                                |
|------------------------------|------------------------------------------------------------------------|
| APOA1 -2630<br>(rs613808)    | 5'-CACAGGCAAAAATCACAAGGGTAAA<br>3'-GTGGCCAAAGCACTTTCACAA               |
| APOA1 -2803<br>(rs2727784)   | 5'-CAGCACCCCCTATCCTGATG<br>3'-TTTGAGGGTGGCCTTGCA                       |
| APOA1 -3012<br>(rs11216158)  | 5'-TGTATTTTTCCATCAGCTCTGTCCAG<br>3'-<br>TTGCAAGGTATTTGGCTTAAACTAGTCTAA |
| APOC3 -2886<br>(rs2542051)   | 5'-GGTCAGTCCAGAGGTCAGAGT<br>3'-GAGGCACATGTCCGTGTGA                     |
| APOC3 -640<br>(rs2542052)    | 5'-CGGCCTTGGCCCTTCTC<br>3'-GCCCCACCCTGTGT                              |
| APOC3 G34G<br>(rs4520)       | 5'-GAGCTTCAGAGGCCGAGGAT<br>3'-CTCCTGCACGCTGCTCAGT                      |
| APOA4 N147S<br>(rs5104)      | 5'-CCGCAGCACTCTCTCCAT<br>3'-ACAACCTGCGAGAGCTTCAG                       |
| APOA4 T29T<br>(rs5092)       | 5'-GGCCTCCTTGGCATTGTTG<br>3'-CCTCATGAATTGCTCTCTGTTACCA                 |
| APOA4A5_inter<br>(rs1263177) | 5'-GTGGCCTGCCAGTTTGG<br>3'-CTGGCTGTGCTGATGAGACT                        |

**Supplemental Table 2. Results of codon usage and transcription factor binding site analysis.**

| SNP           | dbSNP ID   | Allele | Major/Minor | Codon preference <sup>a</sup> | MAPPER values:       |          |                    |                      |
|---------------|------------|--------|-------------|-------------------------------|----------------------|----------|--------------------|----------------------|
|               |            |        |             |                               | Transcription factor | Model ID | Score <sup>b</sup> | E-value <sup>b</sup> |
| APOA1 -2630   | rs613808   | G      | major       | TNP                           | no prediction        |          |                    |                      |
|               |            | A      | minor       | TNP                           | SRF                  | M00922   | 6.0                | 6.2                  |
|               |            |        |             |                               | SRF                  | MA0083   | 5.2                | 2.4                  |
| APOA1 -2803   | rs2727784  | G      | major       | TNP                           | no prediction        |          |                    |                      |
|               |            | A      | minor       | TNP                           | no prediction        |          |                    |                      |
| APOA1 -3012   | rs11216158 | A      | major       | TNP                           | no prediction        |          |                    |                      |
|               |            | G      | minor       | TNP                           | no prediction        |          |                    |                      |
| APOC3 -2886   | rs2542051  | A      | major       | TNP                           | AR                   | MA0007   | 2.8                | 8.1                  |
|               |            | C      | minor       | TNP                           | no prediction        |          |                    |                      |
| APOC3 -640    | rs2542052  | C      | major       | TNP                           | EBF1                 | T05427   | 5.4                | 5.8                  |
|               |            | A      | minor       | TNP                           | MZF1                 | MA0057   | 2.0                | 9.2                  |
| APOC3 G34G    | rs4520     | C      | major       | 22.2                          | TNP                  |          |                    |                      |
|               |            | T      | minor       | 10.8                          | TNP                  |          |                    |                      |
| APOA4 N147S   | rs5104     | G      | major       | TNP                           | TNP                  |          |                    |                      |
|               |            | A      | minor       | TNP                           | TNP                  |          |                    |                      |
| APOA4 T29T    | rs5092     | A      | major       | 15.1                          | TNP                  |          |                    |                      |
|               |            | G      | minor       | 6.1                           | TNP                  |          |                    |                      |
| APOA4A5_inter | rs1263177  | T      | major       | TNP                           | PITX2                | T02413   | 4.0                | 8.9                  |
|               |            |        |             |                               | CRX                  | M00623   | 4.9                | 9.4                  |
|               |            | C      | minor       | TNP                           | MZF1                 | M00084   | 4.3                | 8.9                  |
|               |            |        |             |                               | SPZ1                 | MA0111   | 1.6                | 10.0                 |

TNP = test not performed

<sup>a</sup> Values are given as frequency per thousand codons, based on ref. 47

<sup>b</sup> Values from analysis by MAPPER for putative transcription factor binding sites are reported only for score > 0 and E-value < 12
